# Supplementary material
Source: PubMed Central journal article supplement (PMC2838548)
Supplement: 00924.2009_1.pdf [file 00924.2009_1.pdf]

## 1 **Baroreflex threshold calculation**

2

3 This is a detailed explanation of the algorithm used for the baroreflex threshold calculation. It  
4 was written in Matlab (The MathWorks, Natick, MA) code, using functions in Matlab and the  
5 Statistics Toolbox.

6 Input data were text files that contained two columns of data, the diastolic blood pressure  
7 (mmHg) and the burst area of the muscle sympathetic nerve activity (MSNA, arbitrary units).  
8 Each line represented one heart beat. Burst area 0 meant that no MSNA burst was present in  
9 that heart beat.

10 The result was returned in a structure and was plotted in a figure.

11 The code is provided as additional information on how the calculations were made in this  
12 study. No responsibility for any further use is implied.

13

14

15

```
16 function result = BaroreflexThreshold(TextFile)
17 %BaroreflexThreshold Calculate T50
18
19 a = load(TextFile);
20 DiastBP = a(:,1);
21 MSNAamp = a(:,2);
22 BinWidth = 1; %1 mmHG
23 [B,r,p,neff,T50,xw,yw,BinWidth] = BaroRefThreshold
24 (DiastBP,MSNAamp,BinWidth);
25
26 %Probit analysis
27 T50probit = [];
28 probitslope = [];
29 i1 = ((yw > 0) & (yw < 100));
30 if sum(i1) > 1,
31     xp = xw(i1); %exclude 0 and 100
32     yp = yw(i1) / 100;
33     yp = norminv(yp,0,1); %probit transform
34     P = polyfit(xp,yp,1); %first guess
35     P = P(:);
36
37     %Nonlinear estimation of T50probit
38     X = [ones(sum(i1),1),xp];
39     beta = nlinfit(X,yw(i1),@myf21,P(end:-1:1));
40     T50probit = (norminv(0.5) - beta(1))/beta(end);
41
42     %Probit slope
43     y499 = 49.9;
44     y501 = 50.1;
45     T499probit = (norminv(y499/100) - beta(1))/beta(end);
46     T501probit = (norminv(y501/100) - beta(1))/beta(end);
47     probitslope = (y501 - y499) / (T501probit - T499probit);
48 end;
49
50 %Plot data
51 plot(xw,yw,'b o');
52 hold on;
53
54 %Plot regression line
55 plot([min(xw),max(xw)], [1,1;min(xw),max(xw)] * B,'r- ');
56
57 if sum(i1) > 1,
```

```

58     %Plot probit curve
59     xpp = (xp(1):BinWidth/100:xp(end))';
60     ypp = polyval(beta(end:-1:1),xpp);
61     ypp = normcdf(ypp) * 100;
62     plot(xpp,ypp,'g- ');
63
64     %Plot histogram for DiastBP
65     limmin = fix(min(DiastBP)/BinWidth) * BinWidth;
66     limmax = ceil(max(DiastBP)/BinWidth) * BinWidth;
67     xhc = (limmin + BinWidth/2:BinWidth:limmax - BinWidth/2)';
68     Nh = hist(DiastBP,xhc);
69     Nh = Nh(:) ./ sum(Nh(:)) * 100;
70     plot(xhc,Nh,'g- ');
71 end;
72
73 xlabel('Diastolic BP (mmHg)');
74 str1 = '% heart beats associated with a burst';
75 str2 = 'Linear and probit regression';
76 str3 = 'Diastolic BP histogram';
77 ylabel({str1,str2,str3});
78 str1 = sprintf('y = %6.2f * x + %6.2f',B(end:-1:1));
79 str2 = sprintf('r = %6.3f, p = %6.4f',r,p);
80 str3 = sprintf('T50 = %6.2f, bin width = %6.2f mmHg',T50,BinWidth);
81 str4 = sprintf('T50(probit) = %6.2f, slope =
82 %6.2f',T50probit,probitslope);
83 title({str1,str2,str3,str4});
84
85 result.B = B;
86 result.r = r;
87 result.p = p;
88 result.neff = neff;
89 result.T50 = T50;
90 result.BinWidth = BinWidth;
91 result.T50probit = T50probit;
92 result.probitslope = probitslope;
93
94 return;
95 %-----
96 function yhat = myf21(beta,X)
97 %yhat Model function
98 yhat = 100 * normcdf(X*beta);
99 return;
100 %-----
101 function [B,r,p,ne,T50,dbpClass0,NClass0,w] = BaroRefThreshold(dbp,msa,cw)
102 %BaroThreshold Kienbaums et al, J Physiol 531: 861-869, 2001
103 %
104 % dbp diastolic BP
105 % msa muscle sympathetic nerve activity (MSNA) amplitude
106 % cw bin width
107 %
108 % B linear regression result
109 % r correlation coefficient
110 % p significance
111 % ne adjusted number of points for linear regression
112 % dbpClass0 weighted independent variable
113 % NClass0 weighted dependent variable
114 % w real bin width
115
116 B = [];
117 r = [];

```

```

118 p = [];
119 ne = 0;
120 T50 = [];
121 dbpClass0 = [];
122 NClass0 = [];
123 if nargin < 2, DoHelp('BaroThreshold'); return; end;
124 if (nargin < 3) || isempty(cw), cw = 1; end;
125 if isempty(dbp) || isempty(msa),
126     return;
127 end;
128 w = cw; %bin width, e g 1 mmHg
129
130
131 %make classes
132 limmin = fix(min(dbp)/w) * w;
133 limmax = ceil(max(dbp)/w) * w;
134 classes = (limmin + w/2:w:limmax - w/2)';
135 maxclasses = 5000;
136 if length(classes) > maxclasses,
137     w = (limmax - limmin) / maxclasses;
138     disp(['BaroRefThreshold: Bin width increased to ',num2str(w)]);
139 end;
140 if limmax <= limmin,
141     dd = min([limmin;limmax]) - w;
142     limmax = max([limmin;limmax]) + w;
143     limmin = dd;
144 end;
145 classes = (limmin + w/2:w:limmax - w/2)';
146
147 [N0,d,index0] = Hist22(dbp,classes);
148 if length(classes) == 1,
149     N0 = length(dbp);
150     index0 = ones(N0,1);
151 end;
152 N0 = N0';
153 dbpClass0 = classes(index0);
154
155
156 %skip zeros
157 i1 = find(msa(:,1));
158 if isempty(i1),
159     dbpClass0 = [];
160     return;
161 end;
162 [N1,d,index1] = Hist22(dbp(i1,:),classes);
163 if length(classes) == 1,
164     N1 = length(dbp(i1,:));
165     index1 = ones(N1,1);
166 end;
167 N1 = N1';
168
169 %percent values with multiplicity
170 NClass0 = N1(index0)./N0(index0) * 100;
171 NClass1 = N1(index1)./N0(index1) * 100;
172
173 %Use a subset of dbpClass0 and NClass0
174 [dbpClass0,i3] = sort(dbpClass0);
175 NClass0 = NClass0(i3);
176 %Exclude 100%, except the first and the last 100%
177 i1 = find(NClass0 ~= 100);

```

```

178 if ~isempty(i1) && i1(end) < size(NClass0,1)-1,
179     dc = dbpClass0(i1(end)+1);
180     i2 = find(dbpClass0 > dc);
181     if ~isempty(i2),
182         NClass0(i2) = [];
183         dbpClass0(i2) = [];
184     end;
185 end;
186 if ~isempty(i1) && i1(1) > 2,
187     dc = dbpClass0(i1(1)-1);
188     i2 = find(dbpClass0 < dc);
189     if ~isempty(i2),
190         NClass0(i2) = [];
191         dbpClass0(i2) = [];
192     end;
193 end;
194 %Exclude 0%, except the first and the last 0%
195 i1 = find(NClass0 ~= 0);
196 if ~isempty(i1) && i1(end) < size(NClass0,1)-1,
197     dc = dbpClass0(i1(end)+1);
198     i2 = find(dbpClass0 > dc);
199     if ~isempty(i2),
200         NClass0(i2) = [];
201         dbpClass0(i2) = [];
202     end;
203 end;
204 if ~isempty(i1) && i1(1) > 2,
205     dc = dbpClass0(i1(1)-1);
206     i2 = find(dbpClass0 < dc);
207     if ~isempty(i2),
208         NClass0(i2) = [];
209         dbpClass0(i2) = [];
210     end;
211 end;
212
213 %linear regression
214 ne = length(NClass1);
215 [B,r,p] = mLinReg(dbpClass0,NClass0,ne);
216 T50 = (50-B(1))./B(2);
217
218 return;
219 %-----
220 function [B,r,p,n] = mLinReg(x,y,ne)
221 %mLinReg           simple linear regression with adjustable df
222
223 if (margin < 3 || isempty(ne)),
224     ne = length(y);
225 end;
226
227 B = [];
228 r = [];
229 p = NaN;
230 n = 0;
231
232 if isempty(x) || isempty(y),
233     return;
234 end;
235
236 x = x(:);
237 y = y(:);

```

```

238 i1 = find(~isnan(x + y));
239 x = x(i1);
240 y = y(i1);
241 n = length(y);
242
243 if length(x) > 1,
244     X = [ones(length(x),1),x];
245     B = (X'*X)\X'*y;
246     dfe = ne - 2;
247     SSE = (y-X*B)'*(y-X*B);
248     MSE = SSE/dfe;
249     MSR = B'*X'*(y - mean(y));
250     F0 = MSR/MSE;
251     p = 1 - fcdf(F0,1,dfe);
252 end;
253
254 r = 1;
255 if n > 1, r = corrcoef(x,y); end;
256 if length(r) > 1, r = r(1,2); end;
257
258 return;
259 %-----
260 function [no,xo,yoo] = Hist22(y,x)
261 %Hist2                Histogram, with index output
262 %
263 % N = HIST2(Y) bins the elements of Y into 10 equally spaced containers
264 % and returns the number of elements in each container.  If Y is a
265 % matrix, HIST2 works down the columns.
266 %
267 % N = HIST2(Y,M), where M is a scalar, uses M bins.
268 %
269 % N = HIST2(Y,X), where X is a vector, returns the distribution of Y
270 % among bins with centers specified by X.
271 %
272 % [N,X,YO] = HIST2(...) also returns the position of the bin centers in X
273 % and a matrix of size(Y) that contain the bin numbers into which each
274 % element is sorted.
275 %
276 % HIST2(...) without output arguments produces a histogram bar plot of
277 % the results.
278
279 % J.N. Little 2-06-86
280 % Revised 10-29-87, 12-29-88 LS
281 % Revised 8-13-91 by cmt, 2-3-92 by ls.
282 % Copyright (c) 1984-98 by The MathWorks, Inc.
283 % $Revision: 5.13 $ $Date: 1997/12/02 19:27:08 $
284
285 % Hist2 revised 981015 by tok
286
287 yo = [];
288 yoo = [];
289
290 if nargin == 0,
291     error('Requires one or two input arguments.');
```

```

298     error('Input arguments must be numeric.');
```

```

299 end;
300 [m,n] = size(y);
301 if isempty(y),
302     if length(x) == 1,
303         x = 1:x;
304     end;
305     nn = zeros(size(x)); % No elements to count
306 else
307     if length(x) == 1,
308         miny = min(min(y));
309         maxy = max(max(y));
310         if miny == maxy,
311             miny = miny - floor(x/2) - 0.5;
312             maxy = maxy + ceil(x/2) - 0.5;
313         end;
314         binwidth = (maxy - miny) ./ x;
315         xx = miny + binwidth*(0:x);
316         xx(length(xx)) = maxy;
317         x = xx(1:length(xx)-1) + binwidth/2;
318     else
319         xx = x(:)';
320         miny = min(min(y));
321         maxy = max(max(y));
322         binwidth = [diff(xx) 0];
323         xx = [xx(1)-binwidth(1)/2 xx+binwidth/2];
324         xx(1) = miny;
325         xx(length(xx)) = maxy;
326     end;
327     nbin = length(xx);
328     nn = zeros(nbin,n);
329     yo = zeros(size(y));
330     for i=2:nbin,
331         nn(i,:) = sum(y <= xx(i));
332         for j = 1:n,
333             index = find(y(:,j) <= xx(i) & ~yo(:,j));
334             yo(index,j) = i - 1;
335         end;
336     end;
337     nn = nn(2:nbin,:) - nn(1:nbin-1,:);
338 end;
339
340 if nargout == 0,
341     bar(x,nn,'hist');
342 else
343     yoo = yo;
344     if min(size(y))==1, % Return row vectors if possible.
345         no = nn';
346         xo = x;
347     else
348         no = nn;
349         xo = x';
350     end;
351 end;
352
353 return;
354
```
